# Supplementary material for: The Impact of Oral Antibiotics Prior to Cancer Diagnosis on Overall Patient Survival: Findings from an English Population-Based Cohort Study
Source: MDPI journal article supplement (doi:10.3390/curroncol30090614), 2023-09-15
Supplement: s1 [file s1]

# The Impact of Oral Antibiotics Prior to Cancer Diagnosis on Overall Patient Survival: Findings from an English Population-Based Cohort Study

Eleni Domzaridou <sup>1,\*</sup>, Tjeerd Van Staa <sup>2,3</sup>, Andrew G. Renehan <sup>4</sup>, Natalie Cook <sup>5,6</sup>, William Welfare <sup>7</sup>, Darren M. Ashcroft <sup>1,8</sup> and Victoria Palin <sup>2,9</sup>

<sup>1</sup> National Institute for Health and Care Research Greater Manchester Patient Safety Research Collaboration, School of Health Sciences, Faculty of Biology, Medicine and Health, University of Manchester, Manchester M13 9PL, UK; darren.ashcroft@manchester.ac.uk

<sup>2</sup> Centre for Health Informatics, Division of Informatics, Imaging and Data Science, School of Health Sciences, Faculty of Biology, Medicine and Health, University of Manchester, Manchester M13 9PL, UK; tjeerd.vanstaa@manchester.ac.uk (T.V.S.); victoria.palin@manchester.ac.uk (V.P.)

<sup>3</sup> Utrecht Institute for Pharmaceutical Sciences, Utrecht University, 3584 CS Utrecht, The Netherlands

<sup>4</sup> Centre for Health Informatics, Manchester Cancer Research Centre, University of Manchester, Manchester M13 9PL, UK; andrew.renehan@manchester.ac.uk

<sup>5</sup> Division of Cancer Science, School of Biology, Medicine and Health, University of Manchester, Manchester M13 9PL, UK; natalie.cook@manchester.ac.uk

<sup>6</sup> Christie NHS Foundation Trust, Wilmslow Road, Manchester M20 4BX, UK

<sup>7</sup> Public Health England Northwest, 3 Piccadilly Place, London Road, Manchester M1 3BN, UK; william.welfare@phe.gov.uk

<sup>8</sup> Centre for Pharmacoepidemiology and Drug Safety, Division of Pharmacy and Optometry, School of Health Sciences, Faculty of Biology, Medicine and Health, University of Manchester, Manchester M13 9PL, UK

<sup>9</sup> Maternal and Fetal Research Centre, Division of Developmental Biology and Medicine, University of Manchester, St Marys Hospital, Oxford Road, Manchester M13 9WL, UK

\* Correspondence: eleni.domzaridou@manchester.ac.uk

## Summary

For many cancer types, the survival was significantly lower for patients who received antibiotics shortly before cancer diagnosis, comparing to long past usage. Microbiome may affect cancer therapy outcomes and its potential to act as a new biomarker should be examined.

**Figure S1: Study design - cohorts definition and antibiotic groups**

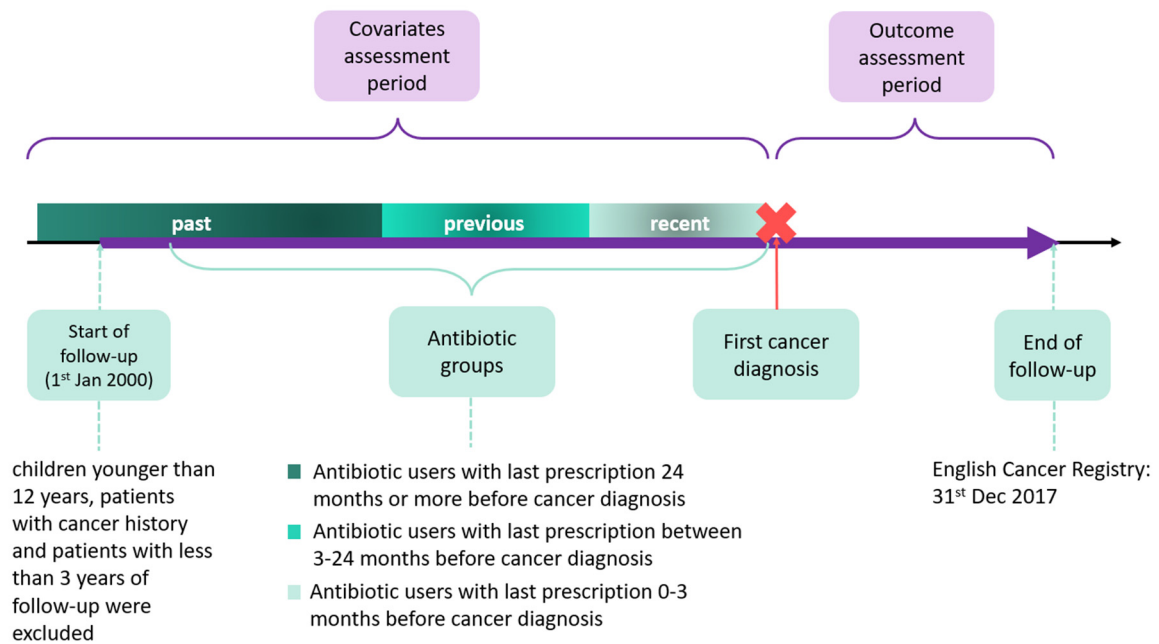

**Table S1: Cancer types, sequence of treatment and possible alternative therapies.**

| Cancer type                                 | Chemotherapy | Surgery  | Radiotherapy | Other                                                             |
|---------------------------------------------|--------------|----------|--------------|-------------------------------------------------------------------|
| Acute lymphoblastic leukaemia (ALL)         | √            |          |              |                                                                   |
| Acute myeloid leukaemia (AML)               | √            |          |              |                                                                   |
| Breast cancer                               | √ (b/a s.)   | √ (1)    | √ (2)        | √ (3): Hormone therapy                                            |
| Chronic lymphocytic leukaemia (CLL)         | √            | √ †      |              | √ Targeted cancer drugs; Steroids                                 |
| Chronic myeloid leukaemia (CML)             | √ (2)        |          | √            | √ (1): Targeted cancer drugs; Bone marrow & stem cell transplant  |
| Colorectal cancer                           | √ (b/a s.)   | √ (1)    | √ (2)        |                                                                   |
| Gastric cancer                              | √ (b/a s.)   | √ (1)    | √ (2)        |                                                                   |
| Hairy-cell leukaemia                        | √ (1)        | √ (3) ‡  |              | √ (2): Targeted cancer drugs                                      |
| Head and neck cancer                        | √ (2)        | √ (1)    | √ (2)        |                                                                   |
| Hodgkin lymphoma                            | √            |          | √            | √ Steroids; Bone marrow transplantation                           |
| Kidney cancer                               | √ *          | √ (1)    | √ (2)        | √ Cryotherapy; Arterial embolisation; Immunotherapy               |
| Liver cancer                                | √            | √ (1)    | √            | √ Transplantation                                                 |
| Lung cancer (small cell)                    | √ (1)        | √ (3)    | √ (2)        |                                                                   |
| Lung cancer (non-small cell)                | √ (2)        | √ (1)    | √ (3)        |                                                                   |
| Melanoma skin cancer                        | √ (2)        | √ (4)    | √ (3)        | √ (1): Biological therapy                                         |
| Myeloma                                     | √ (1)        |          |              | √ (2): Steroids; Biological therapy                               |
| Non-Hodgkin lymphoma (NHL)                  | √            | √        | √            | √ Targeted cancer drugs; Stem cell transplant                     |
| Oesophageal cancer                          | √            | √ (1)    | √            | √ Chemoradiotherapy                                               |
| Ovarian cancer                              | √ (b/a s.)   | √ (1)    |              |                                                                   |
| Pancreatic cancer                           | √ (u)        | √ (r)    |              |                                                                   |
| Prostate cancer                             | √            | √        | √            | √ Hormone therapy; High frequency ultrasound therapy; Cryotherapy |
| Stomach cancer                              | √            | √ (1)    | √            | √ Chemoradiotherapy                                               |
| T cell childhood non-Hodgkin lymphoma (NHL) | √ (1)        |          | √ (2)        |                                                                   |
| Testicular cancer                           | √ (a.s.)     | √ (1)    | √            | √ Chemoradiotherapy                                               |
| Uterus cancer                               | √ (2)        | √ (1)    | √ (2)        | √ (2): Chemoradiotherapy                                          |
| Urinary (bladder) cancer                    | √ (3)        | √ (1)    | √ (2)        |                                                                   |
| Vaginal cancer                              | √ (a. r.)    | √ (1; 2) | √ (2; 1)     |                                                                   |

† If splenectomy is needed; ‡ Splenectomy; \* usually after immunotherapy/radiotherapy, b/a s.: before/after; a.r.: alongside radiotherapy; a.s.: after surgery; u: unresectable; r: respectable

Each number represents preferable treatment therapy according to clinicians' decision-making process and which depends on cancer's stage, type, spread, position, grade and patient's general health condition. Number (1) alone indicates the most usual type of therapy without excluding the possibility of other therapies. In cases where only √ exists, there are more than one different treatment options for this cancer. Neo-adjuvant and adjuvant therapies are represented by √ (b/a s.) indication. Whenever the same number occurs more than once, there are more than one alternative options. Data has been summarised from Cancer Research UK and American Cancer Society websites.<sup>1,2</sup>

## References

- 1 Cancer Research UK. Your cancer type | All cancer types. 2018. <http://www.cancerresearchuk.org/about-cancer/type>.
- 2 American Cancer Society. Cancer. 2018. <https://www.cancer.org/cancer/all-cancer-types.html>.

**Table S2: Baseline characteristics for cancer patients - results from interlinked Cancer Registry cohort.**

|                         | Leukaemia    | Lymphoma     | Myeloma    | Melanoma     | Kidney       | Ovary         | Bladder      | Colorectal   | Uterus        | Breast        | Prostate     | Lung         | Pancreas     | Oesophagus   | Stomach      |
|-------------------------|--------------|--------------|------------|--------------|--------------|---------------|--------------|--------------|---------------|---------------|--------------|--------------|--------------|--------------|--------------|
| Number of patients      | 3 303        | 5 499        | 2 022      | 4 701        | 3 114        | 2 917         | 4 894        | 15 903       | 3 151         | 20 635        | 17 694       | 17 113       | 3 641        | 3 541        | 3 132        |
| Age (mean) <sup>a</sup> | 68           | 66           | 71         | 62           | 68           | 65            | 74           | 72           | 67            | 64            | 72           | 72           | 73           | 72           | 73           |
| Sex = Female (%)        | 1 394 (42.2) | 2 636 (47.9) | 956 (47.3) | 2 607 (55.5) | 1 220 (39.2) | 2 917 (100.0) | 1 477 (30.2) | 7 701 (48.4) | 3 151 (100.0) | 20 495 (99.3) | 0 (0.0)      | 7 683 (44.9) | 1 977 (54.3) | 1 305 (36.9) | 1 151 (36.7) |
| Diabetes (%)            | 461 (14.0)   | 786 (14.3)   | 305 (15.1) | 488 (10.4)   | 598 (19.2)   | 311 (10.7)    | 881 (18.0)   | 2 765 (17.4) | 593 (18.8)    | 2 136 (10.4)  | 2 727 (15.4) | 2 843 (16.6) | 1 013 (27.8) | 625 (17.7)   | 588 (18.8)   |
| COPD (%)                | 546 (16.5)   | 942 (17.1)   | 338 (16.7) | 682 (14.5)   | 548 (17.6)   | 454 (15.6)    | 869 (17.8)   | 2 826 (17.8) | 422 (13.4)    | 3 378 (16.4)  | 3 032 (17.1) | 5 596 (32.7) | 688 (18.9)   | 715 (20.2)   | 633 (20.2)   |
| Asthma (%)              | 391 (11.8)   | 730 (13.3)   | 255 (12.6) | 589 (12.5)   | 405 (13.0)   | 386 (13.2)    | 532 (10.9)   | 2 064 (13.0) | 365 (11.6)    | 2 844 (13.8)  | 2 149 (12.1) | 2 650 (15.5) | 440 (12.1)   | 485 (13.7)   | 436 (13.9)   |
| CVD (%)                 | 290 (8.8)    | 408 (7.4)    | 150 (7.4)  | 284 (6.0)    | 272 (8.7)    | 175 (6.0)     | 527 (10.8)   | 1 462 (9.2)  | 158 (5.0)     | 1 121 (5.4)   | 1 490 (8.4)  | 2 002 (11.7) | 353 (9.7)    | 399 (11.3)   | 342 (10.9)   |
| Heart failure (%)       | 158 (4.8)    | 227 (4.1)    | 104 (5.1)  | 121 (2.6)    | 176 (5.7)    | 120 (4.1)     | 275 (5.6)    | 845 (5.3)    | 87 (2.8)      | 525 (2.5)     | 756 (4.3)    | 1 114 (6.5)  | 179 (4.9)    | 235 (6.6)    | 216 (6.9)    |
| Renal disease (%)       | 344 (10.4)   | 612 (11.1)   | 327 (16.2) | 380 (8.1)    | 553 (17.8)   | 267 (9.2)     | 798 (16.3)   | 2 027 (12.7) | 353 (11.2)    | 1 679 (8.1)   | 2 052 (11.6) | 2 224 (13.0) | 495 (13.6)   | 448 (12.7)   | 412 (13.2)   |

<sup>a</sup>age at the date of diagnoses, COPD: Chronic Obstructive Pulmonary Disease, CVD: Cardiovascular Disease

**Table S3: Life table based on the Cancer Registry.**

| Cancer type | Time period | Patients at risk | Deaths | Censored | Proportion dying | Proportion surviving | Survival probability | % survival |
|-------------|-------------|------------------|--------|----------|------------------|----------------------|----------------------|------------|
| Leukaemia   | 0-1 year    | 3 303            | 1 036  | 0        | 0.31             | 0.69                 | 0.69                 | 69%        |
|             | 1-5 years   | 2 267            | 835    | 271      | 0.39             | 0.61                 | 0.42                 | 42%        |
|             | 5-10 years  | 1 161            | 318    | 474      | 0.34             | 0.66                 | 0.28                 | 28%        |
| Lymphoma    | 0-1 year    | 5 499            | 1 287  | 0        | 0.23             | 0.77                 | 0.77                 | 77%        |
|             | 1-5 years   | 4 212            | 992    | 628      | 0.25             | 0.75                 | 0.58                 | 58%        |
|             | 5-10 years  | 2 592            | 512    | 1 116    | 0.25             | 0.75                 | 0.43                 | 43%        |
| Myeloma     | 0-1 year    | 2 022            | 547    | 0        | 0.27             | 0.73                 | 0.73                 | 73%        |
|             | 1-5 years   | 1 475            | 620    | 166      | 0.45             | 0.55                 | 0.40                 | 40%        |
|             | 5-10 years  | 689              | 282    | 234      | 0.49             | 0.51                 | 0.20                 | 20%        |
| Melanoma    | 0-1 year    | 4 701            | 196    | 0        | 0.04             | 0.96                 | 0.96                 | 96%        |
|             | 1-5 years   | 4 505            | 678    | 768      | 0.16             | 0.84                 | 0.81                 | 81%        |
|             | 5-10 years  | 3 059            | 353    | 1 440    | 0.15             | 0.85                 | 0.69                 | 69%        |
| Kidney      | 0-1 year    | 3 114            | 876    | 0        | 0.28             | 0.72                 | 0.72                 | 72%        |
|             | 1-5 years   | 2 238            | 634    | 419      | 0.31             | 0.69                 | 0.50                 | 50%        |
|             | 5-10 years  | 1 185            | 240    | 512      | 0.26             | 0.74                 | 0.37                 | 37%        |
| Ovarian     | 0-1 year    | 2 917            | 875    | 0        | 0.30             | 0.70                 | 0.70                 | 70%        |
|             | 1-5 years   | 2 042            | 867    | 208      | 0.45             | 0.55                 | 0.39                 | 39%        |
|             | 5-10 years  | 967              | 190    | 414      | 0.25             | 0.75                 | 0.29                 | 29%        |
| Bladder     | 0-1 year    | 4 894            | 1 434  | 0        | 0.29             | 0.71                 | 0.71                 | 71%        |
|             | 1-5 years   | 3 460            | 1 345  | 310      | 0.41             | 0.59                 | 0.42                 | 42%        |
|             | 5-10 years  | 1 805            | 534    | 601      | 0.35             | 0.65                 | 0.27                 | 27%        |
| Colorectal  | 0-1 year    | 15 903           | 4 068  | 0        | 0.26             | 0.74                 | 0.74                 | 74%        |
|             | 1-5 years   | 11 835           | 4 065  | 1 365    | 0.36             | 0.64                 | 0.47                 | 47%        |
|             | 5-10 years  | 6 405            | 1 472  | 2 615    | 0.29             | 0.71                 | 0.34                 | 34%        |
| Uterus      | 0-1 year    | 3 151            | 299    | 0        | 0.09             | 0.91                 | 0.91                 | 91%        |
|             | 1-5 years   | 2 852            | 524    | 414      | 0.20             | 0.80                 | 0.73                 | 73%        |
|             | 5-10 years  | 1 914            | 247    | 825      | 0.16             | 0.84                 | 0.61                 | 61%        |
| Breast      | 0-1 year    | 20 635           | 1 197  | 0        | 0.06             | 0.94                 | 0.94                 | 94%        |
|             | 1-5 years   | 19 438           | 3 165  | 2 953    | 0.18             | 0.82                 | 0.77                 | 77%        |
|             | 5-10 years  | 13 320           | 1 780  | 5 727    | 0.17             | 0.83                 | 0.64                 | 64%        |
| Prostate    | 0-1 year    | 17 694           | 1 306  | 0        | 0.07             | 0.93                 | 0.93                 | 93%        |
|             | 1-5 years   | 16 388           | 3 424  | 2 629    | 0.23             | 0.77                 | 0.72                 | 72%        |
|             | 5-10 years  | 10 335           | 2 170  | 4 543    | 0.27             | 0.73                 | 0.52                 | 52%        |
| Lung        | 0-1 year    | 17 113           | 10 957 | 0        | 0.64             | 0.36                 | 0.36                 | 36%        |
|             | 1-5 years   | 6 156            | 4 052  | 409      | 0.68             | 0.32                 | 0.12                 | 12%        |
|             | 5-10 years  | 1 695            | 783    | 471      | 0.54             | 0.46                 | 0.05                 | 5%         |
| Pancreas    | 0-1 year    | 3 641            | 2 736  | 0        | 0.75             | 0.25                 | 0.25                 | 25%        |
|             | 1-5 years   | 905              | 654    | 51       | 0.74             | 0.26                 | 0.07                 | 7%         |
|             | 5-10 years  | 200              | 107    | 37       | 0.59             | 0.41                 | 0.03                 | 3%         |
| Oesophagus  | 0-1 year    | 3 541            | 1 927  | 0        | 0.54             | 0.46                 | 0.46                 | 46%        |
| continue    |             |                  |        |          |                  |                      |                      |            |

| Cancer type | Time period | Patients at risk | Deaths | Censored | Proportion dying | Proportion surviving | Survival probability | % survival |
|-------------|-------------|------------------|--------|----------|------------------|----------------------|----------------------|------------|
|             | 1-5 years   | 1 614            | 1 050  | 102      | 0.67             | 0.33                 | 0.15                 | 15%        |
|             | 5-10 years  | 462              | 168    | 156      | 0.44             | 0.56                 | 0.09                 | 9%         |
| Stomach     | 0-1 year    | 3 132            | 1 754  | 0        | 0.56             | 0.44                 | 0.44                 | 44%        |
|             | 1-5 years   | 1 378            | 849    | 66       | 0.63             | 0.37                 | 0.16                 | 16%        |
|             | 5-10 years  | 463              | 155    | 139      | 0.39             | 0.61                 | 0.10                 | 10%        |

**Table S4: Hazards ratios (HR) according to cancer type from the Cancer Registry and Primary care records in the CPRD, stratified by recency of issued antibiotic prescriptions (exposure group).**

| Cancer type | Exposure group | Cancer Registry   |                      | Primary Care      |                      |
|-------------|----------------|-------------------|----------------------|-------------------|----------------------|
|             |                | crude HR [95% CI] | adjusted HR [95% CI] | crude HR [95% CI] | adjusted HR [95% CI] |
| Leukaemia   | recent         | 1.34 [1.17-1.52]  | 1.32 [1.16-1.51]     | 1.55 [1.37-1.75]  | 1.53 [1.35-1.73]     |
|             | previous       | 1.12 [0.98-1.26]  | 1.11 [0.98-1.26]     | 1.10 [0.98-1.24]  | 1.17 [1.04-1.32]     |
|             | past           | reference         | reference            | reference         | reference            |
| Lymphoma    | recent         | 1.26 [1.12-1.41]  | 1.22 [1.08-1.36]     | 1.27 [1.16-1.40]  | 1.16 [1.13-1.30]     |
|             | previous       | 1.13 [1.01-1.26]  | 1.09 [0.97-1.22]     | 1.07 [0.98-1.18]  | 1.09 [0.97-1.22]     |
|             | past           | reference         | reference            | reference         | reference            |
| Myeloma     | recent         | 1.22 [1.05-1.43]  | 1.19 [1.04-1.36]     | 1.32 [1.16-1.51]  | 1.14 [0.99-1.32]     |
|             | previous       | 1.07 [0.93-1.24]  | 1.09 [0.96-1.23]     | 1.06 [0.94-1.19]  | 1.00 [0.88-1.15]     |
|             | past           | reference         | reference            | reference         | reference            |
| Melanoma    | recent         | 1.28 [1.11-1.49]  | 1.28 [1.10-1.49]     | 1.16 [1.03-1.31]  | 1.37 [1.21-1.56]     |
|             | previous       | 1.08 [0.95-1.22]  | 1.08 [0.95-1.23]     | 1.02 [0.92-1.15]  | 1.07 [0.96-1.20]     |
|             | past           | reference         | reference            | reference         | reference            |
| Kidney      | recent         | 1.12 [0.97-1.30]  | 1.11 [0.96-1.30]     | 1.37 [1.22-1.54]  | 1.32 [1.14-1.54]     |
|             | previous       | 0.95 [0.83-1.10]  | 0.94 [0.82-1.08]     | 1.05 [0.93-1.18]  | 1.07 [0.93-1.24]     |
|             | past           | reference         | reference            | reference         | reference            |
| Ovarian     | recent         | 1.40 [1.22-1.60]  | 1.34 [1.20-1.50]     | 1.26 [1.13-1.40]  | 1.27 [1.11-1.44]     |
|             | previous       | 1.07 [0.94-1.23]  | 1.02 [0.92-1.14]     | 1.06 [0.95-1.18]  | 1.09 [0.96-1.24]     |
|             | past           | reference         | reference            | reference         | reference            |
| Bladder     | recent         | 1.20 [1.07-1.40]  | 1.39 [1.25-1.54]     | 1.28 [1.16-1.40]  | 1.34 [1.23-1.45]     |
|             | previous       | 1.15 [1.00-1.30]  | 1.16 [1.04-1.30]     | 1.12 [1.01-1.23]  | 1.08 [0.99-1.18]     |
|             | past           | reference         | reference            | reference         | reference            |
| Colorectal  | recent         | 1.22 [1.14-1.30]  | 1.20 [1.13-1.28]     | 1.19 [1.09-1.28]  | 1.22 [1.14-1.30]     |
|             | previous       | 1.04 [0.98-1.10]  | 1.03 [0.97-1.09]     | 1.07 [1.00-1.14]  | 1.05 [0.99-1.11]     |
|             | past           | reference         | reference            | reference         | reference            |
| Uterus      | recent         | 1.43 [1.22-1.69]  | 1.40 [1.18-1.65]     | 1.29 [1.06-1.57]  | 1.23 [1.01-1.50]     |
|             | previous       | 1.14 [0.98-1.32]  | 1.10 [0.95-1.29]     | 1.07 [0.89-1.28]  | 1.03 [0.86-1.24]     |
|             | past           | reference         | reference            | reference         | reference            |
| Breast      | recent         | 1.49 [1.36-1.63]  | 1.36 [1.23-1.49]     | 1.39 [1.25-1.54]  | 1.18 [0.96-1.27]     |
|             | previous       | 1.16 [1.07-1.26]  | 1.10 [1.01-1.20]     | 1.13 [1.03-1.24]  | 1.39 [1.27-1.51]     |
|             | past           | reference         | reference            | reference         | reference            |
| Prostate    | recent         | 1.10 [1.02-1.20]  | 1.22 [1.15-1.30]     | 1.31 [1.22-1.41]  | 1.20 [1.13-1.28]     |
|             | previous       | 0.95 [0.87-1.03]  | 1.03 [0.97-1.10]     | 1.12 [1.04-1.20]  | 1.00 [0.95-1.06]     |
|             | past           | reference         | reference            | reference         | reference            |
| Lung        | recent         | 1.12 [1.05-1.21]  | 1.17 [1.08-1.28]     | 1.04 [0.97-1.12]  | 1.10 [1.02-1.18]     |
|             | previous       | 0.98 [0.92-1.06]  | 1.01 [0.93-1.11]     | 0.96 [0.89-1.04]  | 1.05 [0.97-1.14]     |
|             | past           | reference         | reference            | reference         | reference            |
| Pancreas    | recent         | 1.13 [0.98-1.30]  | 1.07 [0.93-1.24]     | 1.14 [1.05-1.23]  | 1.07 [0.92-1.23]     |

|            |          |                  |                  |                  |                  |
|------------|----------|------------------|------------------|------------------|------------------|
|            | previous | 1.01 [0.88-1.14] | 0.98 [0.86-1.12] | 1.02 [0.95-1.11] | 1.00 [0.88-1.15] |
|            | past     | reference        | reference        | reference        | reference        |
| Oesophagus | recent   | 1.09 [0.97-1.23] | 1.07 [0.94-1.20] | 1.06 [0.92-1.22] | 1.06 [0.92-1.23] |
|            | previous | 0.96 [0.86-1.06] | 0.93 [0.84-1.03] | 0.98 [0.88-1.10] | 0.97 [0.87-1.10] |
|            | past     | reference        | reference        | reference        | reference        |
| Stomach    | recent   | 0.94 [0.82-1.08] | 1.02 [0.89-1.18] | 0.99 [0.86-1.14] | 1.13 [1.02-1.25] |
|            | previous | 0.86 [0.77-0.96] | 0.96 [0.86-1.08] | 0.98 [0.88-1.10] | 0.99 [0.90-1.07] |
|            | past     | reference        | reference        | reference        | reference        |

## Legends to figures S2-S3

### Figure S2: Kaplan Meier plots for each cancer type – English Cancer Registry (Public Health England).

Each curve represents the survival probability for cancer patients who used antibiotics in different time-periods before the cancer diagnosis, according to the expose definition (recent; previous; past). Recent antibiotic users had worst prognoses for all types of cancer in ten-year period except oesophagus, pancreatic and stomach cancer where it is difficult to distinguish the curves due to overlap and long-term follow-up. P-values were calculated from the Log-rank test. Confidence interval is represented in different opacity.

### Figure S3: Kaplan Meier plots - English General Practice Records (Clinical Practice Research Datalink, CPRD).

Each curve represents the survival probability for cancer patients who used antibiotics in different time-periods before the cancer diagnosis, according to the expose definition (recent; previous; past). Recent antibiotic users had worst prognoses for all cancers in ten-year period except lung, pancreatic and stomach cancer where it is difficult to distinguish the curves due to overlap and long-term follow-up. P-values were calculated from the Log-rank test. Confidence interval is represented in different opacity.



Figure S2

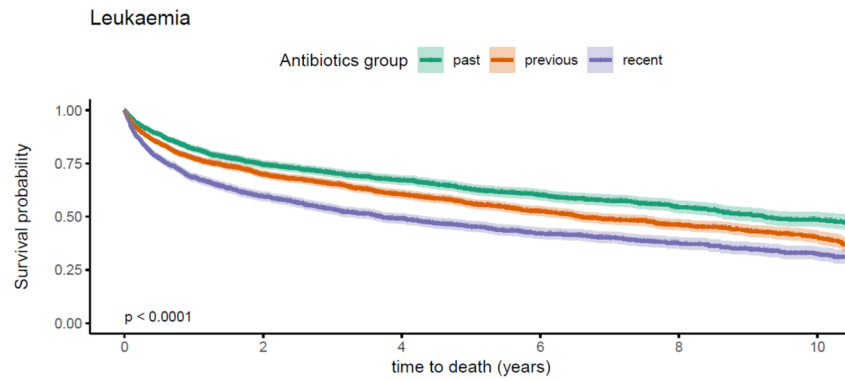

Patients at risk

|      |      |     |     |     |     |
|------|------|-----|-----|-----|-----|
| 1902 | 1090 | 735 | 476 | 272 | 146 |
| 2331 | 1287 | 870 | 542 | 312 | 152 |
| 1840 | 870  | 538 | 333 | 190 | 100 |

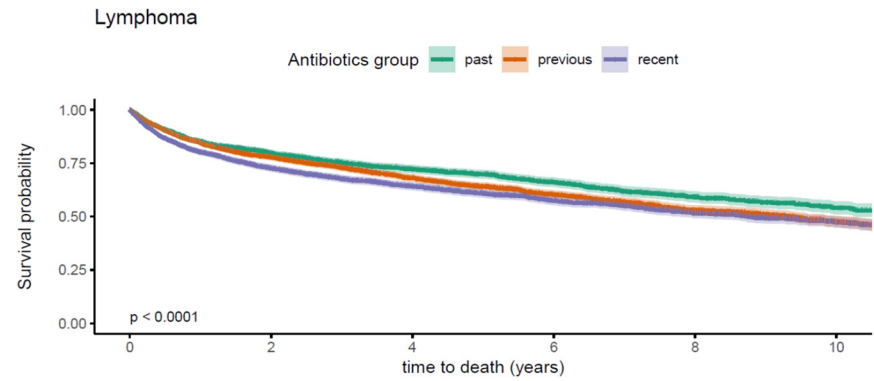

Patients at risk

|      |      |      |     |     |     |
|------|------|------|-----|-----|-----|
| 2340 | 1461 | 1049 | 692 | 386 | 213 |
| 3096 | 1947 | 1301 | 844 | 511 | 291 |
| 2778 | 1631 | 1115 | 726 | 445 | 254 |

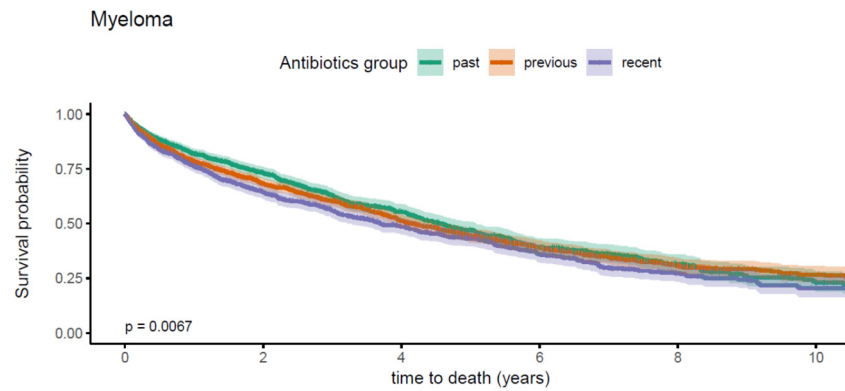

Patients at risk

|      |     |     |     |     |    |
|------|-----|-----|-----|-----|----|
| 1096 | 600 | 319 | 163 | 83  | 35 |
| 1521 | 779 | 428 | 237 | 116 | 53 |
| 1007 | 473 | 254 | 138 | 64  | 27 |

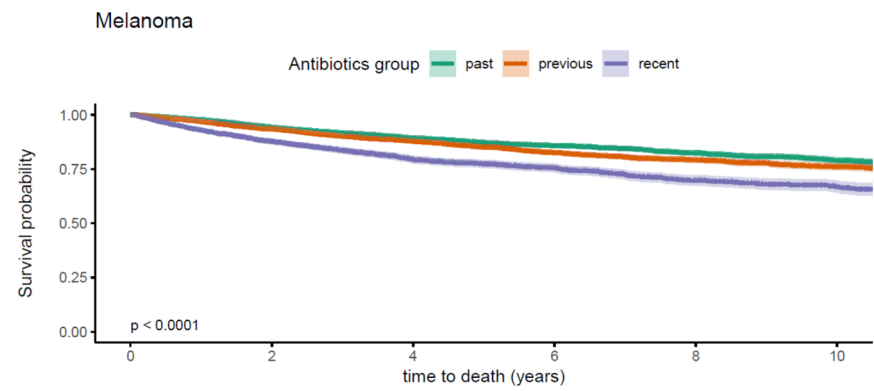

Patients at risk

|      |      |      |      |      |     |
|------|------|------|------|------|-----|
| 5340 | 3872 | 2729 | 1827 | 1167 | 648 |
| 4837 | 3539 | 2497 | 1697 | 1121 | 630 |
| 2440 | 1642 | 1091 | 735  | 445  | 239 |

### Breast Cancer

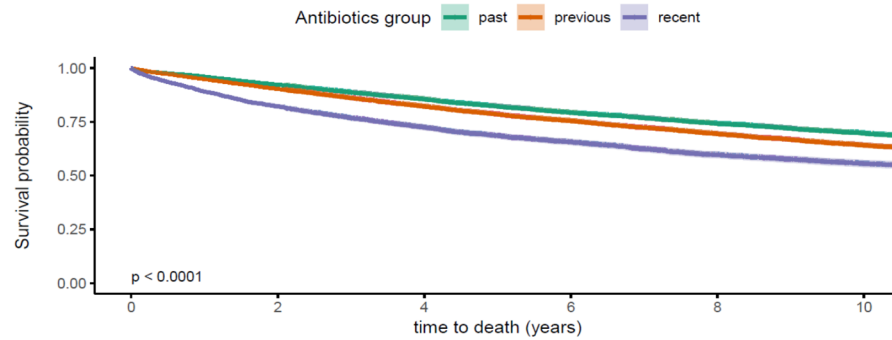

#### Patients at risk

|      |      |      |      |      |      |
|------|------|------|------|------|------|
| 8103 | 7482 | 6221 | 4835 | 3569 | 2461 |
| 8582 | 7752 | 6328 | 4890 | 3567 | 2439 |
| 3950 | 3246 | 2569 | 1919 | 1358 | 919  |

### Colorectal Cancer

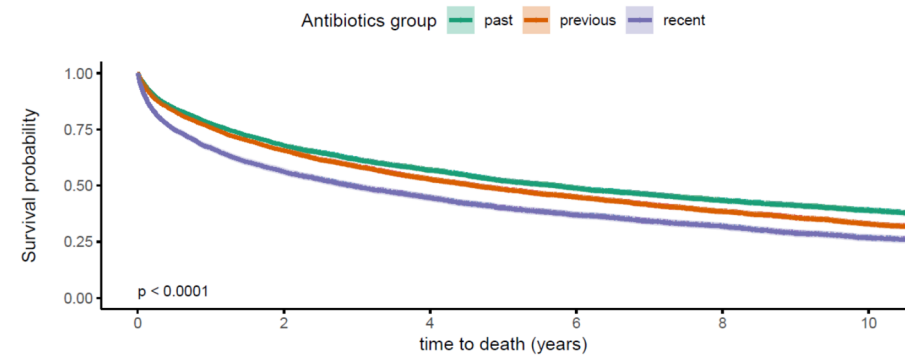

#### Patients at risk

|      |      |      |      |      |      |
|------|------|------|------|------|------|
| 6057 | 4111 | 3101 | 2236 | 1558 | 1021 |
| 6187 | 4062 | 2981 | 2151 | 1438 | 864  |
| 3659 | 2057 | 1468 | 1023 | 700  | 436  |

### Kidney Cancer

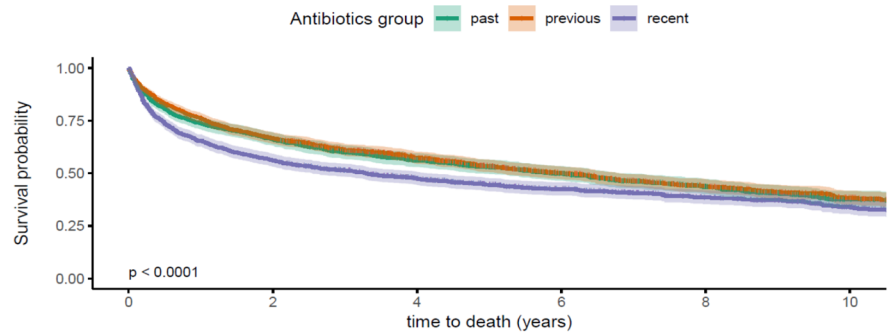

#### Patients at risk

|      |     |     |     |     |     |
|------|-----|-----|-----|-----|-----|
| 882  | 584 | 432 | 312 | 202 | 125 |
| 1188 | 793 | 572 | 399 | 280 | 185 |
| 1044 | 586 | 424 | 286 | 192 | 123 |

### Lung Cancer

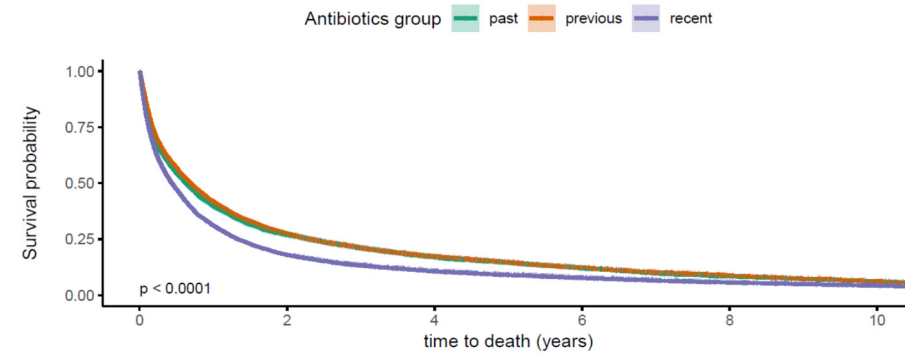

#### Patients at risk

|      |      |     |     |     |     |
|------|------|-----|-----|-----|-----|
| 3338 | 900  | 520 | 321 | 188 | 117 |
| 5097 | 1403 | 806 | 502 | 298 | 165 |
| 8678 | 1563 | 830 | 492 | 285 | 160 |

### Cancer of Oesophagus

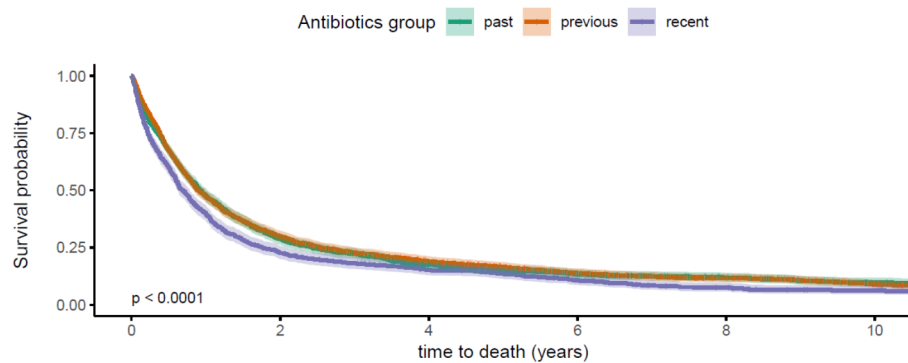

#### Patients at risk

|          |      |     |     |     |     |    |
|----------|------|-----|-----|-----|-----|----|
| past     | 1239 | 356 | 197 | 124 | 85  | 48 |
| previous | 1455 | 436 | 252 | 156 | 106 | 60 |
| recent   | 847  | 192 | 117 | 72  | 45  | 30 |

### Ovarian Cancer

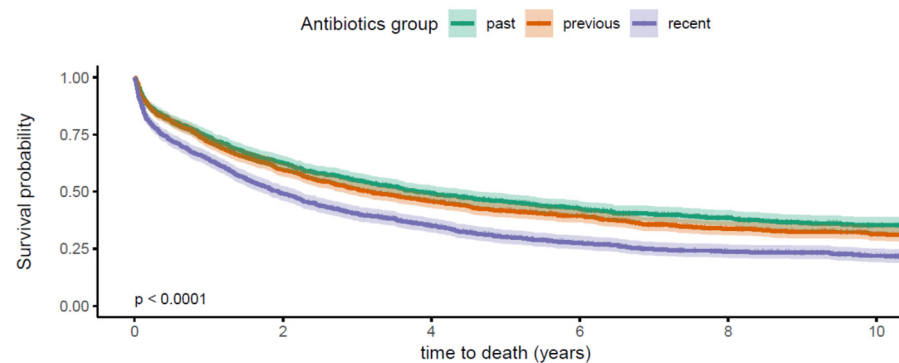

#### Patients at risk

|          |      |     |     |     |     |     |
|----------|------|-----|-----|-----|-----|-----|
| past     | 929  | 580 | 417 | 294 | 201 | 131 |
| previous | 1061 | 631 | 441 | 323 | 212 | 145 |
| recent   | 927  | 456 | 290 | 191 | 135 | 88  |

### Pancreatic Cancer

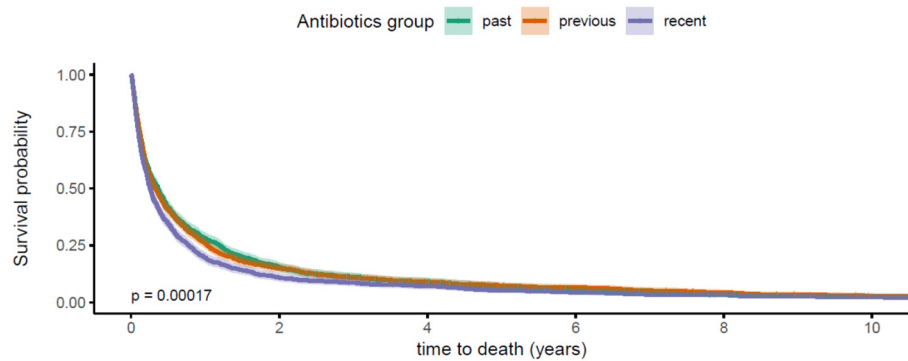

#### Patients at risk

|          |      |     |     |    |    |    |
|----------|------|-----|-----|----|----|----|
| past     | 1208 | 188 | 101 | 51 | 28 | 20 |
| previous | 1347 | 201 | 110 | 69 | 41 | 23 |
| recent   | 1086 | 118 | 68  | 38 | 22 | 13 |

### Prostate Cancer

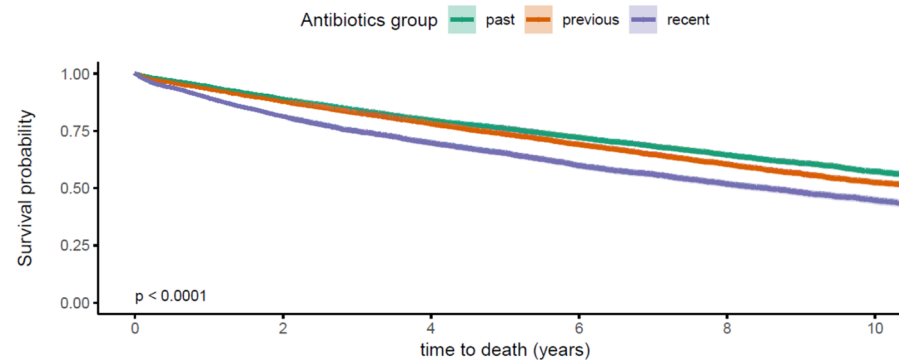

#### Patients at risk

|          |      |      |      |      |      |      |
|----------|------|------|------|------|------|------|
| past     | 6364 | 5664 | 4456 | 3327 | 2257 | 1421 |
| previous | 6547 | 5748 | 4563 | 3329 | 2237 | 1394 |
| recent   | 4783 | 3894 | 2967 | 2043 | 1356 | 811  |

### Stomach Cancer

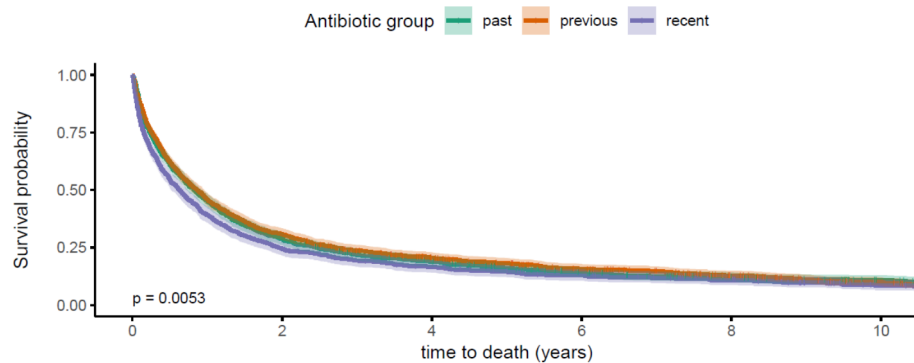

#### Patients at risk

|          |      |     |     |     |     |    |
|----------|------|-----|-----|-----|-----|----|
| past     | 1064 | 306 | 192 | 126 | 92  | 67 |
| previous | 1315 | 405 | 251 | 173 | 113 | 73 |
| recent   | 753  | 184 | 118 | 82  | 59  | 29 |

### Urinary Cancer

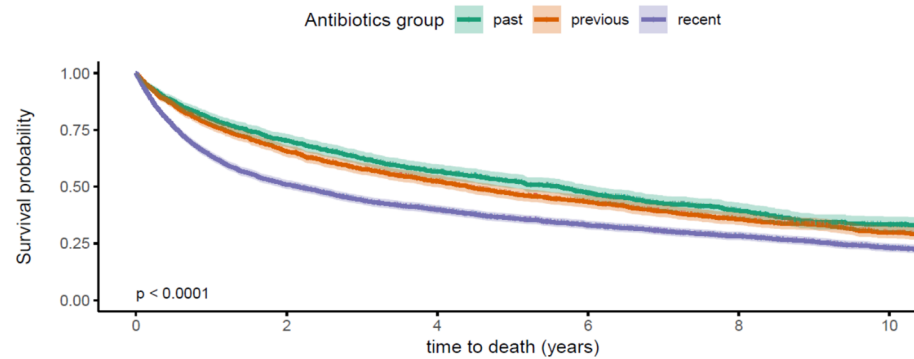

#### Patients at risk

|          |      |      |     |     |     |     |
|----------|------|------|-----|-----|-----|-----|
| past     | 987  | 694  | 520 | 380 | 249 | 171 |
| previous | 1397 | 917  | 672 | 492 | 335 | 220 |
| recent   | 2510 | 1278 | 929 | 663 | 460 | 280 |

### Cancer of Uterus

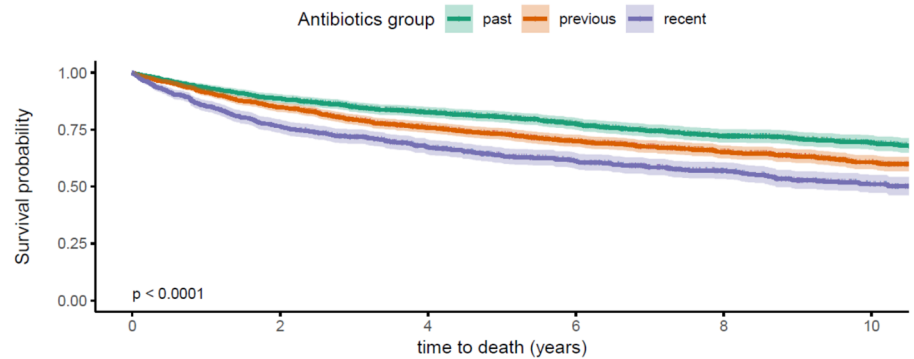

#### Patients at risk

|          |      |      |     |     |     |     |
|----------|------|------|-----|-----|-----|-----|
| past     | 1077 | 954  | 798 | 627 | 474 | 336 |
| previous | 1258 | 1066 | 851 | 673 | 487 | 336 |
| recent   | 816  | 625  | 500 | 378 | 265 | 171 |

Figure S3

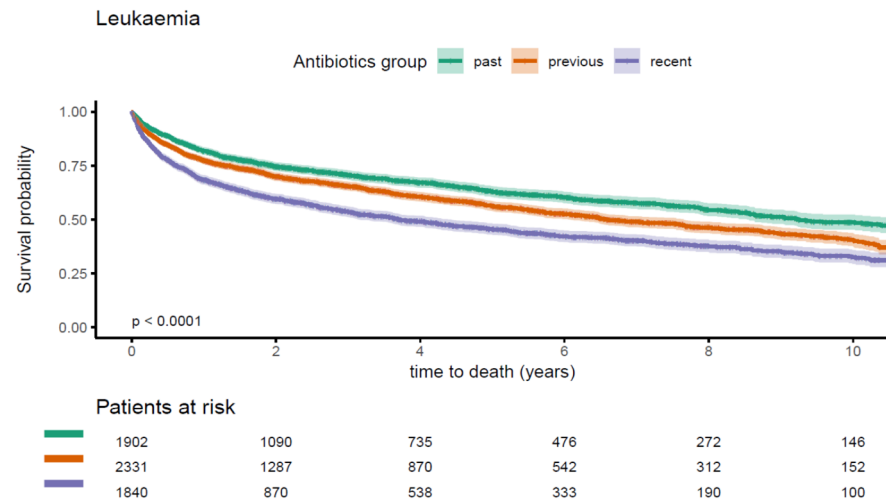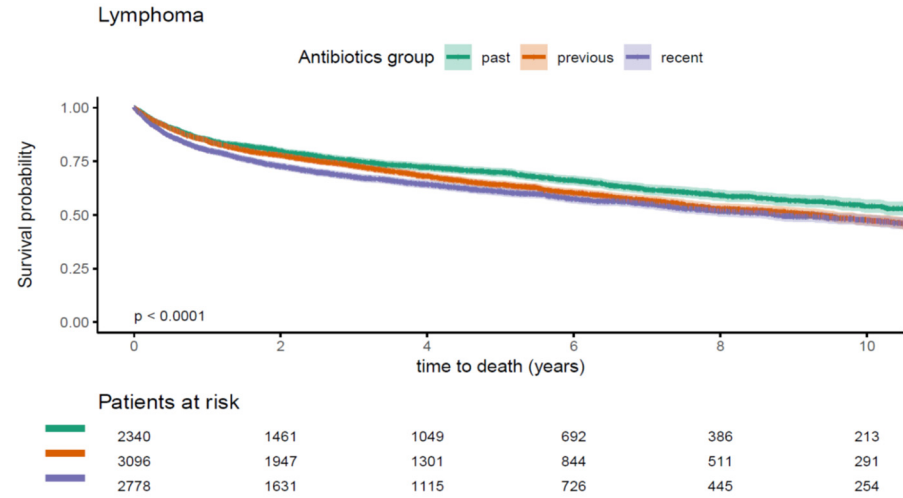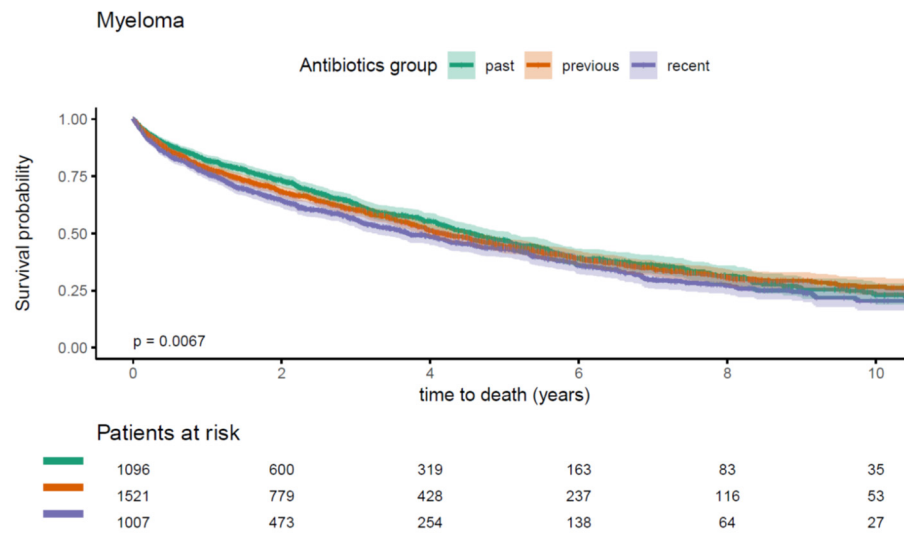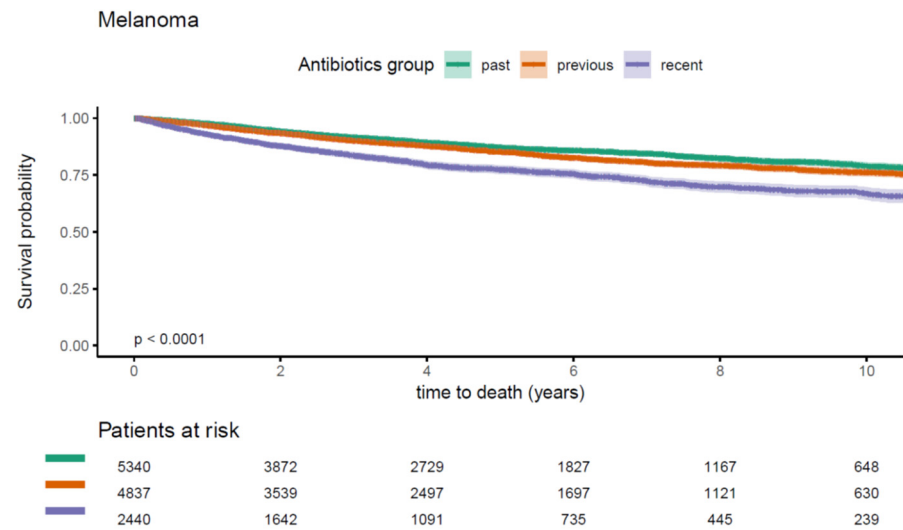

### Breast Cancer

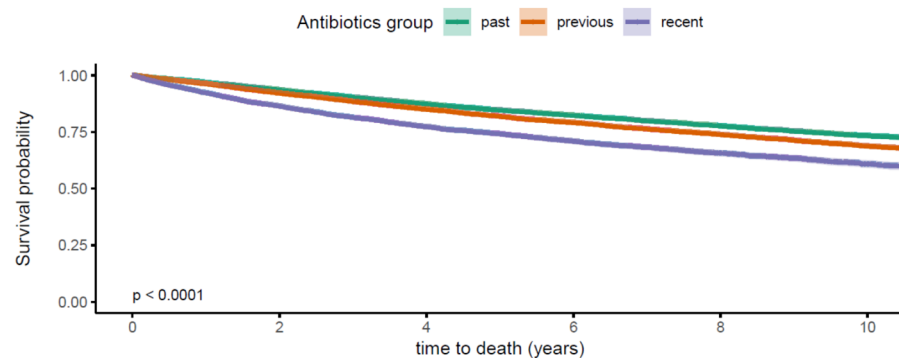

#### Patients at risk

|          |       |       |      |      |      |      |
|----------|-------|-------|------|------|------|------|
| past     | 15185 | 11054 | 7696 | 5241 | 3277 | 1895 |
| previous | 15537 | 11375 | 7987 | 5402 | 3432 | 1944 |
| recent   | 7348  | 5026  | 3416 | 2268 | 1402 | 769  |

### Colorectal Cancer

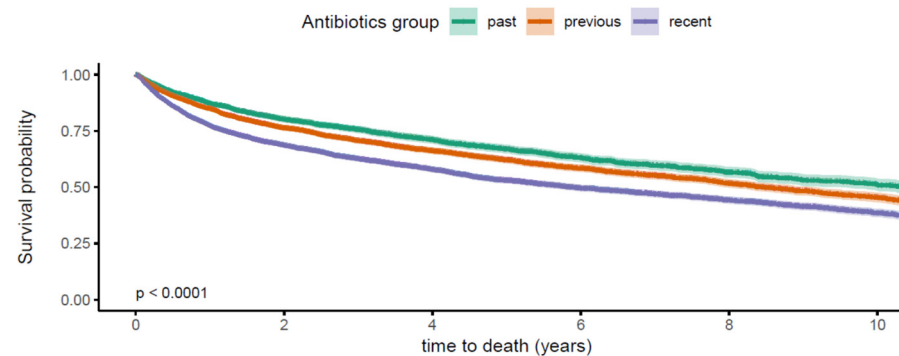

#### Patients at risk

|          |      |      |      |      |     |     |
|----------|------|------|------|------|-----|-----|
| past     | 3056 | 1917 | 1273 | 811  | 484 | 269 |
| previous | 4599 | 2785 | 1821 | 1212 | 751 | 400 |
| recent   | 6149 | 3316 | 2142 | 1309 | 741 | 369 |

### Kidney Cancer

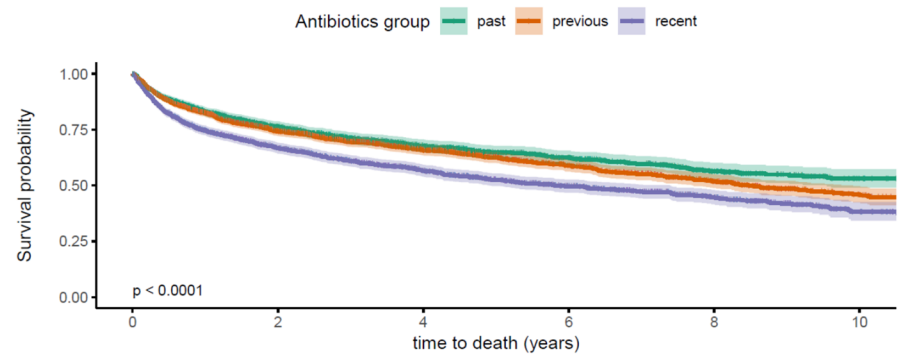

#### Patients at risk

|          |      |      |     |     |     |     |
|----------|------|------|-----|-----|-----|-----|
| past     | 1394 | 793  | 478 | 311 | 177 | 91  |
| previous | 1933 | 1107 | 730 | 448 | 259 | 120 |
| recent   | 1664 | 854  | 540 | 322 | 166 | 62  |

### Lung Cancer

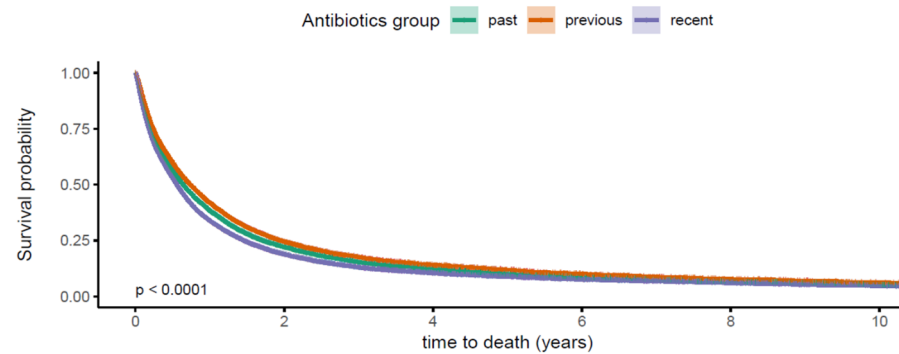

#### Patients at risk

|          |       |      |     |     |     |    |
|----------|-------|------|-----|-----|-----|----|
| past     | 4417  | 694  | 271 | 125 | 66  | 31 |
| previous | 7180  | 1285 | 530 | 257 | 126 | 52 |
| recent   | 12255 | 1700 | 660 | 342 | 169 | 73 |

### Cancer of Oesophagus

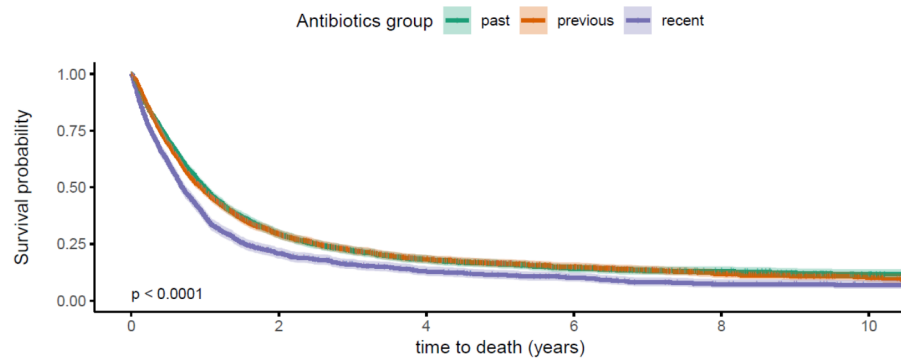

#### Patients at risk

|  |      |     |     |     |    |    |
|--|------|-----|-----|-----|----|----|
|  | 2209 | 481 | 217 | 111 | 69 | 34 |
|  | 2350 | 519 | 246 | 140 | 72 | 29 |
|  | 1392 | 213 | 105 | 62  | 31 | 13 |

### Ovarian Cancer

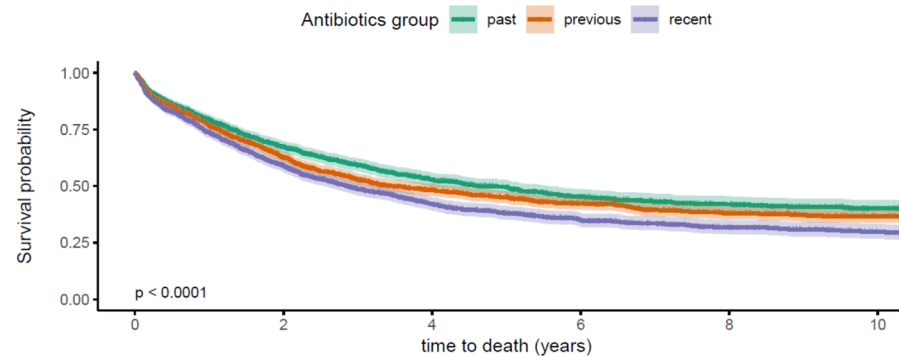

#### Patients at risk

|  |      |     |     |     |     |     |
|--|------|-----|-----|-----|-----|-----|
|  | 1324 | 702 | 419 | 263 | 176 | 91  |
|  | 1570 | 800 | 475 | 315 | 197 | 116 |
|  | 1382 | 640 | 349 | 222 | 133 | 83  |

### Pancreatic Cancer

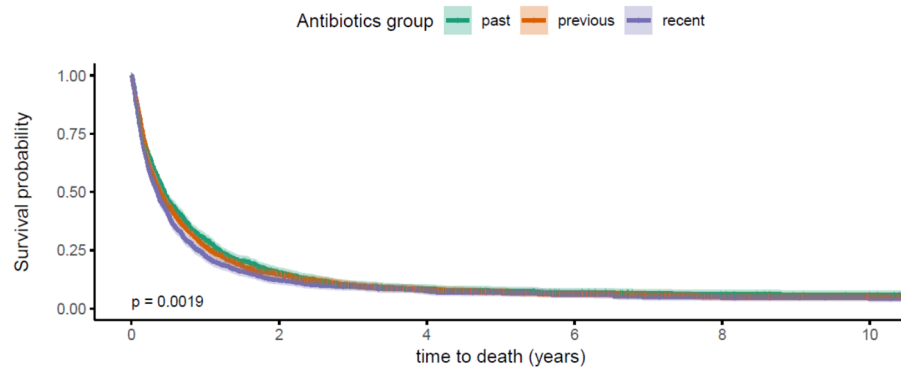

#### Patients at risk

|  |      |     |    |    |    |    |
|--|------|-----|----|----|----|----|
|  | 1443 | 145 | 63 | 38 | 22 | 12 |
|  | 1625 | 168 | 62 | 35 | 14 | 9  |
|  | 1242 | 105 | 47 | 28 | 16 | 10 |

### Prostate Cancer

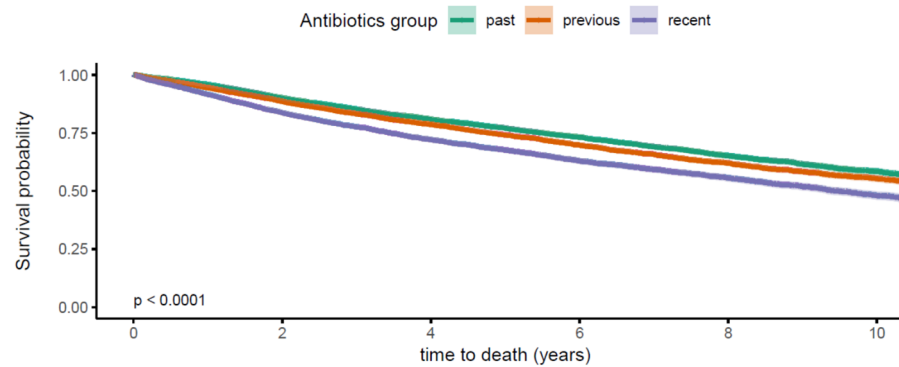

#### Patients at risk

|  |       |      |      |      |      |     |
|--|-------|------|------|------|------|-----|
|  | 10501 | 7294 | 4765 | 2990 | 1757 | 887 |
|  | 10663 | 7527 | 5031 | 3183 | 1896 | 977 |
|  | 7755  | 5136 | 3285 | 2034 | 1198 | 595 |

### Stomach Cancer

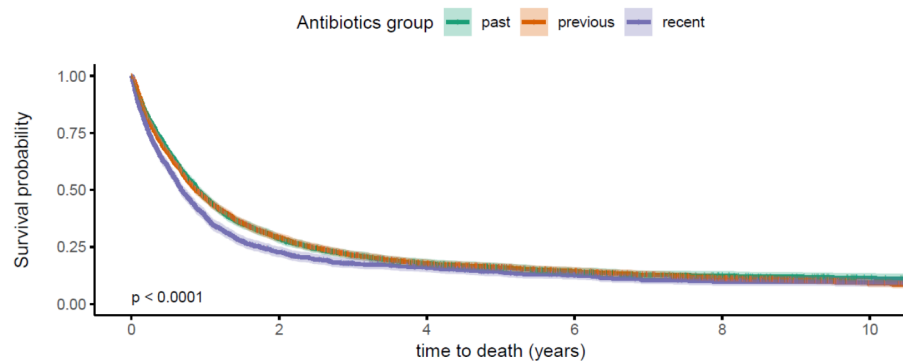

#### Patients at risk

|          |      |     |     |     |    |    |
|----------|------|-----|-----|-----|----|----|
|          | 0    | 2   | 4   | 6   | 8  | 10 |
| past     | 2296 | 477 | 230 | 128 | 78 | 36 |
| previous | 2564 | 583 | 281 | 171 | 92 | 40 |
| recent   | 1477 | 260 | 142 | 81  | 41 | 23 |

### Urinary Cancer

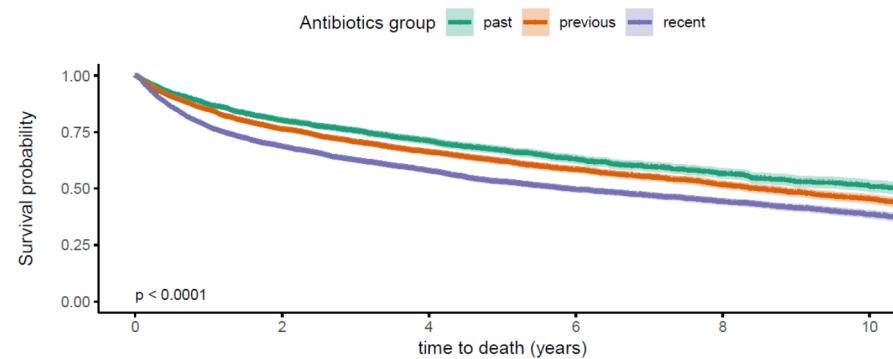

#### Patients at risk

|          |      |      |      |      |     |     |
|----------|------|------|------|------|-----|-----|
|          | 0    | 2    | 4    | 6    | 8   | 10  |
| past     | 3056 | 1917 | 1273 | 811  | 484 | 269 |
| previous | 4599 | 2785 | 1821 | 1212 | 751 | 400 |
| recent   | 6149 | 3316 | 2142 | 1309 | 741 | 369 |

### Cancer of Uterus

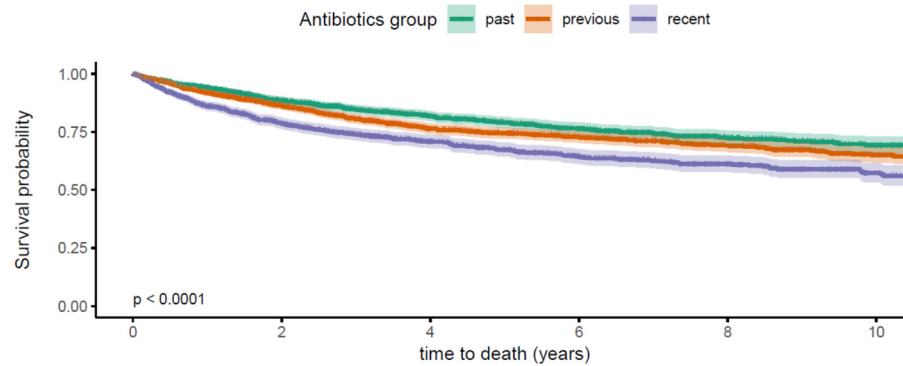

#### Patients at risk

|          |      |      |     |     |     |     |
|----------|------|------|-----|-----|-----|-----|
|          | 0    | 2    | 4   | 6   | 8   | 10  |
| past     | 1470 | 998  | 676 | 444 | 254 | 138 |
| previous | 1673 | 1133 | 733 | 504 | 323 | 172 |
| recent   | 1179 | 732  | 473 | 308 | 180 | 98  |



**Table S5: Antibiotics usage for cancer patients that received prescriptions between 0-3 months before cancer diagnosis. Results from the Cancer Registry cohort. Number of recent antibiotic users and percentage (%) per cancer type.**

| Antibiotics*                                | Leukemia   | Lymphoma   | Myeloma   |
|---------------------------------------------|------------|------------|-----------|
| Amoxicillin (b)-amoxicillin/Ca <sup>†</sup> | 397 (38)   | 703 (38)   | 231 (41)  |
| Flucloxacillin (b)                          | 110 (11)   | 220 (12)   | 44 (8)    |
| Trimethoprim (S)                            | 85 (8)     | 149 (8)    | 74 (13)   |
| Erythromycin (M)                            | 83 (8)     | 127 (7)    | 27 (5)    |
| Clarithromycin (M)                          | 78 (7)     | 139 (7)    | 41 (7)    |
| Phenoxymethylpenicillin (b)                 | 62 (6)     | 102 (5)    | 11 (2)    |
| Cephalexin (C)                              | 53 (5)     | 86 (5)     | 35 (6)    |
| Doxycycline (T)                             | 52 (5)     | 87 (5)     | 24 (4)    |
| Ciprofloxacin (Q)                           | 48 (5)     | 93 (5)     | 29 (5)    |
| Cefaclor (C)                                | 18 (2)     | 17 (1)     | 9 (2)     |
| Metronidazole (Ni)                          | 15 (1)     | 35 (2)     | 4 (1)     |
| All antibiotic users                        | 1043 (100) | 1864 (100) | 570 (100) |

\*Antibiotic route may include oral, intramuscular, intravenous and rectal administration however, 99.9% refer to oral antibiotics; <sup>†</sup>Ca: Clavulanic acid; Antibiotic categories in parentheses: (b) = b-lactam; (S) = Sulphonamides; (M) = Macrolides; (C) = Cephalosporins; (Q) = Quinolones; (T) = Tetracyclines; (Ni) = Nitroimidazole

**Table S6: English Cancer Registry (National Cancer Registration and Analysis Service, Public Health England) - sensitivity analysis. The cohort was stratified to the following groups to test whether this classification has a significant effect on hazards ratio (HR) findings.**

|                               |                   | Leukaemia        | Lymphoma         | Myeloma          |
|-------------------------------|-------------------|------------------|------------------|------------------|
| Stratification by             | antibiotics group | HR [95% CI]      | HR [95% CI]      | HR [95% CI]      |
| people younger than 65 years  | recent            | 1.70 [1.30-2.22] | 1.29 [1.05-1.60] | 1.27 [0.94-1.70] |
|                               | previous          | 1.38 [1.04-1.81] | 1.12 [0.90-1.39] | 1.24 [0.94-1.62] |
|                               | past              | reference        | reference        | reference        |
| people 65 years and older     | recent            | 1.15 [0.96-1.37] | 1.06 [0.94-1.21] | 1.18 [0.99-1.41] |
|                               | previous          | 1.13 [0.96-1.36] | 1.06 [0.93-1.22] | 1.01 [0.86-1.19] |
|                               | past              | reference        | reference        | reference        |
| gender = male                 | recent            | 1.28 [1.08-1.52] | 1.18 [1.02-1.38] | 1.10 [0.89-1.66] |
|                               | previous          | 1.16 [1.00-1.36] | 1.10 [0.95-1.28] | 1.08 [0.89-1.31] |
|                               | past              | reference        | reference        | reference        |
| gender = female               | recent            | 1.35 [1.10-1.67] | 1.13 [0.96-1.34] | 1.34 [1.07-1.67] |
|                               | previous          | 1.14 [0.94-1.39] | 1.16 [0.99-1.36] | 1.09 [0.88-1.35] |
|                               | past              | reference        | reference        | reference        |
| follow-up before 2008         | recent            | 1.15 [0.97-1.38] | 1.03 [0.87-1.21] | 0.88 [0.66-1.18] |
|                               | previous          | 1.08 [0.91-1.27] | 1.20 [1.03-1.40] | 0.76 [0.57-1.00] |
|                               | past              | reference        | reference        | reference        |
| follow-up after 2008          | recent            | 1.21 [1.00-1.47] | 1.19 [0.98-1.45] | 1.11 [0.87-1.41] |
|                               | previous          | 1.49 [1.22-1.81] | 1.06 [0.88-1.29] | 1.06 [0.84-1.32] |
|                               | past              | reference        | reference        | reference        |
| people without comorbidities* | recent            | 1.23 [1.01-1.50] | 1.06 [0.87-1.29] | 1.32 [1.04-1.68] |
|                               | previous          | 1.34 [1.10-1.66] | 1.11 [0.92-1.33] | 1.16 [0.93-1.44] |
|                               | past              | reference        | reference        | reference        |
| people with comorbidities*    | recent            | 1.15 [1.00-1.33] | 1.11 [0.97-1.29] | 1.09 [0.89-1.33] |
|                               | previous          | 1.58 [1.36-1.83] | 1.02 [0.89-1.18] | 1.00 [0.82-1.21] |
|                               | past              | reference        | reference        | reference        |

\*People who did not have any recorded comorbidity according to either Charlson Comorbidity Index or QCancer risk tool related variables on which the models were adjusted.

**Table S7: English General Practices (Clinical Practice Research Datalink, CPRD) - sensitivity analyses.**  
**The cohort was stratified to the following groups to test whether this classification has a significant effect on hazards ratio findings.**

|                               |                          | <b>Leukaemia</b>   | <b>Lymphoma</b>    | <b>Myeloma</b>     |
|-------------------------------|--------------------------|--------------------|--------------------|--------------------|
| <b>Stratification by</b>      | <b>antibiotics group</b> | <b>HR [95% CI]</b> | <b>HR [95% CI]</b> | <b>HR [95% CI]</b> |
| people younger than 65 years  | recent                   | 2.04 [1.32-3.35]   | 1.94 [1.08-3.83]   | 1.14 [0.87-1.49]   |
|                               | previous                 | 1.52 [0.91-2.71]   | 0.98 [0.61-1.88]   | 1.10 [0.86-1.39]   |
|                               | past                     | reference          | reference          | reference          |
| people 65 years and older     | recent                   | 1.35 [1.17-1.56]   | 1.12 [0.98-1.29]   | 1.06 [0.92-1.22]   |
|                               | previous                 | 1.05 [0.92-1.20]   | 1.10 [0.96-1.25]   | 0.93 [0.81-1.05]   |
|                               | past                     | reference          | reference          | reference          |
| gender = male                 | recent                   | 1.68 [1.44-1.96]   | 1.2 [1.06-1.36]    | 1.13 [0.95-1.34]   |
|                               | previous                 | 1.16 [1.00-1.35]   | 1.04 [0.92-1.18]   | 0.99 [0.85-1.16]   |
|                               | past                     | reference          | reference          | reference          |
| gender = female               | recent                   | 1.36 [1.12-1.66]   | 1.26 [1.09-1.45]   | 0.99 [0.82-1.18]   |
|                               | previous                 | 1.07 [0.88-1.29]   | 1.11 [0.96-1.28]   | 0.92 [0.78-1.09]   |
|                               | past                     | reference          | reference          | reference          |
| follow-up before 2008         | recent                   | 1.43 [1.22-1.69]   | 1.21 [1.06-1.38]   | 1.08 [0.91-1.29]   |
|                               | previous                 | 1.12 [0.96-1.31]   | 1.09 [0.96-1.24]   | 0.97 [0.83-1.14]   |
|                               | past                     | reference          | reference          | reference          |
| follow-up after 2008          | recent                   | 1.65 [1.38-1.99]   | 1.30 [1.13-1.49]   | 0.99 [0.79-1.23]   |
|                               | previous                 | 1.12 [0.93-1.33]   | 1.01 [0.88-1.16]   | 0.93 [0.76-1.14]   |
|                               | past                     | reference          | reference          | reference          |
| people without comorbidities* | recent                   | 1.72 [1.47-2.02]   | 1.18 [1.01-1.37]   | 1.11 [0.91-1.36]   |
|                               | previous                 | 1.06 [0.91-1.25]   | 1.12 [0.97-1.30]   | 0.95 [0.80-1.14]   |
|                               | past                     | reference          | reference          | reference          |
| people with comorbidities     | recent                   | 1.46 [1.24-1.71]   | 1.34 [1.19-1.51]   | 1.12 [0.96-1.30]   |
|                               | previous                 | 1.12 [0.96-1.30]   | 1.05 [0.93-1.18]   | 1.03 [0.89-1.19]   |
|                               | past                     | reference          | reference          | reference          |

\*People who did not have any recorded comorbidity according to either Charslon Comorbidity Index or QCancer risk tool related variables on which the models were adjusted.
